# Supplementary material for: Advancedin situtechnology for Li/Na metal anodes: an in-depth mechanistic understanding
Source: Royal Society of Chemistry journal article supplement (doi:10.1039/d1ee00110h), 2021-01-01
Supplement: d1ee00110h1.pdf [file d1ee00110h1.pdf]

## Supporting Information

### **Advanced *In-Situ* Technology for Li/Na Metal Anodes: An In-Depth Mechanism Understanding**

Jun Pu,<sup>‡</sup> <sup>\*,a</sup> Chenglin Zhong,<sup>‡</sup> <sup>b,c</sup> Jiahao Liu, <sup>c</sup> Zhenghua Wang, <sup>a</sup> and Dongliang Chao <sup>\*,c</sup>

<sup>a</sup> Key Laboratory of Functional Molecular Solids, Ministry of Education, Anhui Provincial Engineering Laboratory for New-Energy Vehicle Battery Energy-Storage Materials, College of Chemistry and Materials Science, Anhui Normal University, Wuhu 241002, China. *E-mail:* [jpu@ahnu.edu.cn](mailto:jpu@ahnu.edu.cn). (*J. Pu*)

<sup>b</sup> College of Chemistry and Chemical Engineering, Linyi University, Linyi 276005, Shandong, China

<sup>c</sup> Laboratory of Advanced Materials, Fudan University, Shanghai 200433, China. *Email:* [chaod@fudan.edu.cn](mailto:chaod@fudan.edu.cn). (*D. Chao*)

<sup>‡</sup> These authors contributed equally to this work

**Summary of Li/Na metal anodes with different *in-situ* technologies:**

**Table S1.** Performance and parameters of Li/Na anodes with functional solvents or Li/Na salts.

| Solvents or Li/Na salts | Half cells test                |                                  |       |       | Symmetrical cells test         |                                 |            | Ref. |
|-------------------------|--------------------------------|----------------------------------|-------|-------|--------------------------------|---------------------------------|------------|------|
|                         | Current (mA cm <sup>-2</sup> ) | Capacity (mAh cm <sup>-2</sup> ) | CE    | Cycle | Current (mA cm <sup>-2</sup> ) | Capacity (mA cm <sup>-2</sup> ) | Cycle      |      |
| FEC solvent             | --                             | --                               | --    | --    | 2                              | 3.3                             | ~1100      | 1    |
| VEC solvent             | 0.5                            | 0.5                              | 98.1% | 1400  | 1                              | 1                               | 500        | 2    |
| FFS solvent             | 0.5                            | 0.5                              | 99%   | 400   | 0.5                            | 0.5                             | 550        | 3    |
| LiTFPFB salt            | --                             | --                               | --    | --    | 0.5                            | 0.5                             | 250        | 4    |
| LiHFDF salt             | --                             | --                               | --    | --    | 0.5<br>2                       | 1<br>4                          | 250<br>~90 | 5    |
| NaDFOB salt             | --                             | --                               | --    | --    | 1.5                            | 0.1                             | 515        | 6    |

Annotations:

1. FEC: fluoroethylene carbonate

VEC: vinylethylene carbonate

FFS: “full fluorosulfonyl” electrolyte

LiTFPFB: lithium trifluoro(perfluoro-tert-butyloxy)borate

LiHFDF: lithium 1, 1, 2, 2, 3, 3-hexafluoropropane-1, 3-disulfonimide

NaDFOB: sodium-difluoro(oxalato)borate

2. “--” means that no information is provided in the literature.

**Table S2.** Performance and parameters of Li/Na anodes with different additives.

| Additives                        | Half cells test                   |                                     |       |       | Symmetrical cells test            |                                     |       | Ref. |
|----------------------------------|-----------------------------------|-------------------------------------|-------|-------|-----------------------------------|-------------------------------------|-------|------|
|                                  | Current<br>(mA cm <sup>-2</sup> ) | Capacity<br>(mAh cm <sup>-2</sup> ) | CE    | Cycle | Current<br>(mA cm <sup>-2</sup> ) | Capacity<br>(mAh cm <sup>-2</sup> ) | Cycle |      |
| Li <sub>2</sub> S <sub>8</sub>   | 0.5                               | 0.5                                 | ~97%  | ~120  | 10                                | 10                                  | 2000  | 7    |
| PSD                              | 2                                 | 1                                   | 99.1% | 420   |                                   |                                     |       | 8    |
|                                  | 2                                 | 2                                   | 99%   | 250   | --                                | --                                  | --    |      |
|                                  | 2                                 | 3                                   | 98.9% | 250   |                                   |                                     |       |      |
| PST                              | 2                                 | 1                                   | 99%   | 400   |                                   |                                     |       | 9    |
|                                  | 2                                 | 2                                   | 98.9% | 220   | --                                | --                                  | --    |      |
|                                  | 2                                 | 3                                   | 98.6% | 220   |                                   |                                     |       |      |
| LiPO <sub>2</sub> F <sub>2</sub> | --                                | --                                  | --    | --    | 0.5                               | 0.5                                 | 250   | 10   |
|                                  |                                   |                                     |       |       | 1                                 | 1                                   | 100   |      |
| LiDFOB                           | 0.5                               | 1                                   | 98.5% | 200   | 1                                 | 1                                   | 300   | 11   |
|                                  |                                   |                                     |       |       | 2                                 | 1                                   | 180   |      |
| KPF <sub>6</sub>                 | --                                | --                                  | --    | --    | 0.5                               | 0.5                                 | 216   | 12   |
| SbF <sub>3</sub>                 | --                                | --                                  | --    | --    | 0.5                               | 0.5                                 | ~500  | 13   |
| HFAA                             | --                                | --                                  | --    | --    | 1                                 | 0.5                                 | 200   | 14   |
|                                  |                                   |                                     |       |       | 2                                 | 1                                   | 100   |      |
| TCBQ                             | --                                | --                                  | --    | --    | 5                                 | 2                                   | ~22   | 15   |
|                                  |                                   |                                     |       |       | 3                                 | 1                                   | ~150  |      |
| AlCl <sub>3</sub>                | 0.5                               | 2                                   | 99%   | 150   | 0.5                               | 1                                   | ~237  | 16   |
| SiCl <sub>4</sub>                | --                                | --                                  | --    | --    | 3                                 | 1                                   | ~500  | 17   |
| SO <sub>2</sub> Cl <sub>2</sub>  | 0.5                               | 0.5                                 | 95%   | 150   | 0.5                               | 1                                   | 500   | 18   |
|                                  |                                   |                                     |       |       | 1                                 | 1                                   | 600   |      |

Annotations:

1. PSD: poly(sulfur-random-1,3-diisopropenylbenzene)

PST: poly(sulfur-random-triallylamine)

LiDFOB: lithium difluoro(oxalate)borate

HFAA: hexafluoroacetylacetone

TCBQ: tetrachloro-1,4-benzoquinone

2. "--" means that no information is provided in the literature.

**Table S3.** Performance and parameters of Li/Na anodes with high concentration electrolytes.

| Additives                                          | Half cells test                   |                                     |              |             | Symmetrical cells test            |                                     |             | Ref. |
|----------------------------------------------------|-----------------------------------|-------------------------------------|--------------|-------------|-----------------------------------|-------------------------------------|-------------|------|
|                                                    | Current<br>(mA cm <sup>-2</sup> ) | Capacity<br>(mAh cm <sup>-2</sup> ) | CE           | Cycle       | Current<br>(mA cm <sup>-2</sup> ) | Capacity<br>(mAh cm <sup>-2</sup> ) | Cycle       |      |
| 4 M LiFSI-DME                                      | 4<br>10                           | 1<br>1                              | 98.4%<br>97% | 1000<br>500 | 10                                | 0.5                                 | 6000        | 19   |
| 2.1 M NaFSI/DME-<br>BTfE                           | 1                                 | 1                                   | ~99%         | 400         | 1<br>2                            | 1<br>1                              | 500<br>~960 | 20   |
| 3 M LiCF <sub>3</sub> SO <sub>3</sub> -<br>DOL/DME | 1                                 | 3                                   | 98.6%        | 100         | 1                                 | 3                                   | ~135        | 21   |
| 4 M LiTFSI-<br>LiDFOB-FEC/DMC                      | 0.5                               | 1                                   | >98%         | 800         | 0.5                               | 0.5                                 | 500         | 22   |
| 10 M LiFSI-<br>EC/DMC                              | 0.5                               | 1                                   | 98.8%        | 150         | --                                | --                                  | --          | 23   |

Annotations:

1. "--" means that no information is provided in the literature.

**Table S4.** Performance and parameters of Li/Na anodes with *in-situ* protective layers.

| Additives                             | Half cells test                   |                                     |       |       | Symmetrical cells test            |                                     |       | Ref. |
|---------------------------------------|-----------------------------------|-------------------------------------|-------|-------|-----------------------------------|-------------------------------------|-------|------|
|                                       | Current<br>(mA cm <sup>-2</sup> ) | Capacity<br>(mAh cm <sup>-2</sup> ) | CE    | Cycle | Current<br>(mA cm <sup>-2</sup> ) | Capacity<br>(mAh cm <sup>-2</sup> ) | Cycle |      |
| COF layer                             | --                                | --                                  | --    | --    | 1                                 | 1                                   | 200   | 24   |
|                                       | --                                | --                                  | --    | --    | 2                                 | 2                                   | 200   |      |
| PPy@Ni foam                           | 1                                 | 2                                   | 99%   | 250   |                                   |                                     |       | 25   |
|                                       | 1                                 | 5                                   | 98%   | 90    | --                                | --                                  | --    |      |
|                                       | 1                                 | 10                                  | --    | 60    |                                   |                                     |       |      |
| PDA@3D Cu                             | 0.5                               | 1                                   | 97.3% | 200   |                                   |                                     |       | 26   |
|                                       | 1                                 | 1                                   | 96.2% | 150   | 1                                 | 1                                   | 500   |      |
|                                       | 2                                 | 2                                   | 96.4% | 150   |                                   |                                     |       |      |
| CAM layer                             | 3                                 | 1                                   | 99%   | 400   | 0.5                               | 1.5                                 | ~258  | 27   |
| LiECHFP layer                         | --                                | --                                  | --    | --    | 1                                 | 1                                   |       | 28   |
|                                       | --                                | --                                  | --    | --    | 2                                 | 2                                   | 100   |      |
|                                       | --                                | --                                  | --    | --    | 5                                 | 5                                   |       |      |
| CPLi                                  | --                                | --                                  | --    | --    | 3                                 | 2                                   | ~750  | 29   |
| LiF layer                             | --                                | --                                  | --    | --    | 1                                 | 1                                   | 350   | 30   |
|                                       | --                                | --                                  | --    | --    | 2                                 | 1                                   | 400   |      |
|                                       | --                                | --                                  | --    | --    | 5                                 | 1                                   | 240   |      |
| LPS layer                             | --                                | --                                  | --    | --    | 1                                 | 1                                   | 200   | 31   |
|                                       | --                                | --                                  | --    | --    | 4                                 | 1                                   | 800   |      |
| Li <sub>3</sub> PS <sub>4</sub> layer | --                                | --                                  | --    | --    | 0.5                               | 1                                   | 400   | 32   |
| Na <sub>3</sub> PS <sub>4</sub> layer | --                                | --                                  | --    | --    | 1                                 | 1                                   | ~135  | 33   |
|                                       | --                                | --                                  | --    | --    | 3                                 | 1                                   | ~210  |      |
| [LiNBH] <sub>n</sub> layer            | --                                | --                                  | --    | --    | 1                                 | 1                                   | 550   | 34   |
|                                       | --                                | --                                  | --    | --    | 3                                 | 1                                   | ~1050 |      |
| Li-Al layer                           | --                                | --                                  | --    | --    | 0.5                               | 1                                   | 800   | 35   |
|                                       | --                                | --                                  | --    | --    | 5                                 | 1                                   | ~1125 |      |
| LiF/Cu layer                          | --                                | --                                  | --    | --    | 2.5                               | 0.5                                 | ~2000 | 36   |

|                                      |    |    |    |    |                     |                 |                   |    |
|--------------------------------------|----|----|----|----|---------------------|-----------------|-------------------|----|
| O-I hybrid layer                     | -- | -- | -- | -- | 1<br>2              | 1<br>1          | 1500<br>1100      | 37 |
| 3D LiF-Li layer                      | -- | -- | -- | -- | 1                   | 1               | 800               | 38 |
| LiF layer (G-S)                      | -- | -- | -- | -- | 1<br>3<br>5         | 1<br>1<br>1     | 300<br>180<br>300 | 39 |
| C-Li <sub>2</sub> S-LiI layer        | -- | -- | -- | -- | 1<br>2<br>3         | 1<br>1<br>1     | 300<br>200<br>200 | 40 |
| Al <sub>2</sub> O <sub>3</sub> layer | -- | -- | -- | -- | 0.25<br>0.25<br>0.5 | 0.125<br>1<br>1 | 900<br>50<br>30   | 41 |

Annotations:

1. COF: covalent organic framework

PPy: polymerizing polypyrrole

PDA: polydopamine

CAM: cyanuric acid and melamine

LiECHFP: lithium 2-((ethoxycarbonyl)oxy)-1,1,1,3,3,3-hexafluoro-propan-2-olate

CPLi: carboxylate-protected Li

LPS: Li<sub>3</sub>PS<sub>4</sub>

O-I: organic-inorganic

G-S: gas-solid reaction

2. "--" means that no information is provided in the literature.

**Table S5.** Performance and parameters of Li/Na anodes with *in-situ* polymer electrolytes.

| Additives   | Half cells test                   |                                     |    |       | Symmetrical cells test            |                                     |       | Ref. |
|-------------|-----------------------------------|-------------------------------------|----|-------|-----------------------------------|-------------------------------------|-------|------|
|             | Current<br>(mA cm <sup>-2</sup> ) | Capacity<br>(mAh cm <sup>-2</sup> ) | CE | Cycle | Current<br>(mA cm <sup>-2</sup> ) | Capacity<br>(mAh cm <sup>-2</sup> ) | Cycle |      |
| Quasi SSGPE | --                                | --                                  | -- | --    | 1                                 | 1                                   | 220   | 42   |
| PEGA+PFE    | --                                | --                                  | -- | --    | 2                                 | 4                                   | 1000  | 43   |

Annotations:

1. SSGPE: solid state gel polymer electrolyte

PEGA+PFE: poly(ethylene glycol) methyl ether methacrylate + 2,2,3,3,3-pentafluoropropyl acrylate

2. "--" means that no information is provided in the literature.

**Table S6.** Performance and parameters of Li/Na anodes with *in-situ* growth techniques.

| Additives                 | Half cells test                   |                                     |       |       | Symmetrical cells test            |                                     |       | Ref. |
|---------------------------|-----------------------------------|-------------------------------------|-------|-------|-----------------------------------|-------------------------------------|-------|------|
|                           | Current<br>(mA cm <sup>-2</sup> ) | Capacity<br>(mAh cm <sup>-2</sup> ) | CE    | Cycle | Current<br>(mA cm <sup>-2</sup> ) | Capacity<br>(mAh cm <sup>-2</sup> ) | Cycle |      |
| Au NPs@C                  | 0.5                               | 1                                   | >98%  | 300   | --                                | --                                  | --    | 44   |
| Sn-C                      | 2                                 | 1                                   | 99.7% | 500   |                                   |                                     |       |      |
|                           | 2                                 | 3                                   | 99.5% | 250   | --                                | --                                  | --    | 45   |
|                           | 2                                 | 5                                   | 99.3% | 250   |                                   |                                     |       |      |
| NaF@SnO <sub>2</sub> -RGO | 1                                 | 0.5                                 | 99.7% | 3000  | 0.5                               | 1                                   | 900   | 46   |

Annotations:

1. "--" means that no information is provided in the literature.



## Reference

- [1] E. Markevich, G. Salitra, F. Chesneau, M. Schmidt and D. Aurbach, *ACS Energy Lett.*, 2017, **2**, 1321–1326.
- [2] Q. K. Zhang, S. Liu, Z. H. Lin, K. Wang, M. Chen, K. Xu, W. S. Li, *Nano Energy*, 2020, **74**, 104860.
- [3] W. J. Xue, Z. Shi, M. J. Huang, S. T. Feng, C. Wang, F. Wang, J. Lopez, B. Qiao, G. Y. Xu, W. X. Zhang, Y. H. Dong, R. Gao, Y. Shao-Horn, J. A. Johnson and J. Li, *Energy Environ. Sci.*, 2020, **13**, 212–220.
- [4] L. X. Qiao, Z. L. Cui, B. B. Chen, G. J. Xu, Z. H. Zhang, J. Ma, H. P. Du, X. C. Liu, S. Q. Huang, K. Tang, S. M. Dong, X. H. Zhou and G. L. Cui, *Chem. Sci.*, 2018, **9**, 3451–3458.
- [5] Y. L. Xiao, B. Han, Y. Zeng, S.-S. Chi, X. Z. Zeng, Z. J. Zheng, K. Xu and Y. H. Deng, *Adv. Energy Mater.*, 2020, **10**, 1903937.
- [6] L. N. Gao, J. Chen, Y. Q. Liu, Y. Yamauchi, Z. G. Huang and X. Q. Kong, *J. Mater. Chem. A*, 2018, **6**, 12012–12017.
- [7] X.-B. Cheng, H.-J. Peng, J.-Q. Huang, R. Zhang, C.-Z. Zhao and Q. Zhang, *ACS Nano*, 2015, **9**, 6373–6382.
- [8] G. X. Li, Q. Q. Huang, X. He, Y. Gao, D. W. Wang, S. H. Kim and D. H. Wang, *ACS Nano*, 2018, **12**, 1500–1507.
- [9] G. X. Li, Y. Gao, X. He, Q. Q. Huang, S. R. Chen, S. H. Kim and D. H. Wang, *Nat. Commun.*, 2017, **8**, 850.
- [10] P. C. Shi, L. C. Zhang, H. F. Xiang, X. Liang, Y. Sun and W. Xu, *ACS Appl. Mater. Interfaces*, 2018, **10**, 22201–22209.
- [11] L. Yu, S. R. Chen, H. K. Lee, L. C. Zhang, M. H. Engelhard, Q. Y. Li, S. H. Jiao, J. Liu, W. Xu and J.-G. Zhang, *ACS Energy Lett.*, 2018, **3**, 2059–2067.
- [12] S. M. Wood, C. H. Pham, R. Rodriguez, S. S. Nathan, A. D. Dolocan, H. Celio, J. P. Souza, K. C. Klavetter, A. Heller and C. B. Mullins, *ACS Energy Lett.*, 2016, **1**, 414–419.
- [13] W. Fang, H. Jiang, Y. Zheng, H. Zheng, X. Liang, Y. Sun, C. H. Chen and H. F. Xiang, *J. Power Sources*, 2020, **455**, 227956.
- [14] J. Dong, H. L. Dai, Q. F. Fan, C. Lai and S. Q. Zhang, *Nano Energy*, 2019, **66**, 104128.
- [15] X. W. Shen, H. Q. Ji, J. Liu, J. Q. Zhou, C. L. Yan and T. Qian, *Energy Storage Mater.*, 2020, **24**, 426–431.
- [16] H. Ye, Y.-X. Yin, S.-F. Zhang, Y. Shi, L. Liu, X.-X. Zeng, R. Wen, Y.-G. Guo and L.-J. Wan, *Nano Energy*, 2017, **36**, 411–417.

- [17] Q. Zhao, Z. Y. Tu, S. Y. Wei, K. H. Zhang, S. Choudhury, X. T. Liu and L. A. Archer, *Angew. Chem. Int. Ed.*, 2018, **57**, 992–996.
- [18] X. X. Fu, G. Wang, D. Dang, Q. B. Liu, X. H. Xiong and C. D. Wu, *J. Mater. Chem. A*, 2019, **7**, 25003–25009
- [19] J. F. Qian, W. A. Henderson, W. Xu, P. Bhattacharya, M. Engelhard, O. Borodin and J.-G. Zhang, *Nat. Commun.*, 2015, **6**, 6362.
- [20] J. M. Zheng, S. R. Chen, W. G. Zhao, J. H. Song, M. H. Engelhard and J.-G. Zhang, *ACS Energy Lett.*, 2018, **3**, 315–321.
- [21] H. H. Xu, S. F. Wang and A. Manthiram, *Adv. Energy Mater.*, 2018, **8**, 1800813.
- [22] W. Wang, J. L. Zhang, Q. Yang, S. W. Wang, W. H. Wang and B. H. Li, *ACS Appl. Mater. Interfaces*, 2020, **12**, 22901–22909.
- [23] X. D. Ren, S. R. Chen, H. Lee, D. H. Mei, M. H. Engelhard, S. D. Burton, W. G. Zhao, J. M. Zheng, Q. Y. Li, M. S. Ding, M. Schroeder, J. Alvarado, K. Xu, Y. S. Meng, J. Liu, J.-G. Zhang and W. Xu, *Chem*, 2018, **4**, 174–185.
- [24] D. D. Chen, S. Huang, L. Zhong, S. J. Wang, M. Xiao, D. M. Han and Y. Z. Meng, *Adv. Funct. Mater.*, 2020, **30**, 1907717.
- [25] Z. W. Wen, Y. Y. Peng, J. L. Cong, H. M. Hua, Y. X. Lin, J. Xiong, J. Zeng and J. B. Zhao, *Nano Res.*, 2019, **12**, 2535–2542.
- [26] J. M. Jiang, Z. H. Pan, Z. K. Kou, P. Nie, C. L. Chen, Z. W. Li, S. P. Li, Q. Zhu, H. Dou, X. G. Zhang and J. Wang, *Energy Storage Mater.*, 2020, **29**, 84–91.
- [27] Q. F. Yang, M. N. Cui, J. L. Hu, F. L. Chu, Y. J. Zheng, J. J. Liu and C. L. Li, *ACS Nano*, 2020, **14**, 1866–1878.
- [28] Q. F. Yang, M. N. Cui, J. L. Hu, F. L. Chu, Y. J. Zheng, J. J. Liu and C. L. Li, *ACS Nano*, 2020, **14**, 1866–1878.
- [29] D. M. Kang, S. Sardar, R. Zhang, H. Noam, J. Y. Chen, L. G. Ma, W. B. Liang, C. S. Shi and J. P. Lemmon, *Energy Storage Mater.*, 2020, **27**, 69–77.
- [30] G. Wang, X. H. Xiong, D. Xie, X. X. Fu, Z. H. Lin, C. H. Yang, K. L. Zhang and M. L. Liu, *ACS Appl. Mater. Interfaces*, 2019, **11**, 4962–4968.
- [31] Q. Pang, X. Liang, A. Shyamsunder and L. F. Nazar, *Joule*, 2017, **1**, 871–886.
- [32] J. W. Liang, X. N. Li, Y. Zhao, L. V. Goncharova, G. M. Wang, K. R. Adair, C. H. Wang, R. Y. Li, Y. C.

- Zhu, Y. T. Qian, L. Zhang, R. Yang, S. G. Lu and X. L. Sun, *Adv. Mater.*, 2018, **30**, 1804684.
- [33] Y. Zhao, J. W. Liang, Q. Sun, L. V. Goncharova, J. W. Wang, C. H. Wang, K. R. Adair, X. N. Li, F. P. Zhao, Y. P. Sun, R. Y. Li and X. L. Sun, *J. Mater. Chem. A*, 2019, **7**, 4119–4125.
- [34] Z. J. Wang, Y. Y. Wang, Z. H. Zhang, X. W. Chen, W. Lie, Y.-B. He, Z. Zhou, G. L. Xia and Z. P. Guo, *Adv. Funct. Mater.*, 2020, **30**, 2002414.
- [35] B. Q. Xu, Z. Liu, J. X. Li, X. Huang, B. Y. Qie, T. Y. Gong, L. Y. Tan, X. J. Yang, D. Paley, M. Dontigny, K. Zaghib, X. B. Liao, Q. Cheng, H. W. Zhai, X. Chen, L.-Q. Chen, C.-W. Nan, Y.-H. Lin and Y. Yang, *Nano Energy*, 2020, **67**, 104242.
- [36] C. Yan, X.-B. Cheng, Y.-X. Yao, X. Shen, B.-Q. Li, W.-J. Li, R. Zhang, J.-Q. Huang, H. Li and Q. Zhang, *Adv. Mater.*, 2018, **30**, 1804461.
- [37] J. J. Yang, C. J. Hu, Y. Jia, Y. C. Pang, L. Wang, W. Liu and X. M. Sun, *ACS Appl. Mater. Interfaces*, 2019, **11**, 8717–8724.
- [38] K. Q. Qin, J. Baucom, D. L. Liu, W. Y. Shi, N. Q. Zhao and Y. F. Lu, *Small*, 2020, **16**, 2000794.
- [39] J. Zhao, L. Liao, F. F. Shi, T. Lei, G. X. Chen, A. Pei, J. Sun, K. Yan, G. M. Zhou, J. Xie, C. Liu, Y. Z. Li, Z. Liang, Z. N. Bao and Y. Cui, *J. Am. Chem. Soc.*, 2017, **139**, 11550–11558.
- [40] Y. Nan, S. M. Li, M. Q. Zhu, B. Li and S. B. Yang, *ACS Appl. Mater. Interfaces*, 2019, **11**, 28878–28884.
- [41] W. Luo, C.-F. Lin, O. Zhao, M. Noked, Y. Zhang, G. W. Rubloff and L. B. Hu, *Adv. Energy Mater.*, 2017, **7**, 1601526.
- [42] F.-Q. Liu, W.-P. Wang, Y.-X. Yin, S.-F. Zhang, J.-L. Shi, L. Wang, X.-D. Zhang, Y. Zheng, J.-J. Zhou, L. Li and Y.-G. Guo, *Sci. Adv.*, 2018, **4**, eaat5383.
- [43] Q. Zhou, S. M. Dong, Z. L. Lv, G. J. Xu, L. Huang, Q. L. Wang, Z. L. Cui and G. L. Cui, *Adv. Energy Mater.*, 2020, **10**, 1903441.
- [44] K. Yan, Z. D. Lu, H.-W. Lee, F. Xiong, P.-C. Hsu, Y. Z. Li, J. Zhao, S. Chu and Y. Cui, *Nat. Energy*, 2016, **1**, 16010.
- [45] H. Wang, E. Matios, C. L. Wang, J. M. Luo, X. Lu, X. F. Hu, Y. W. Zhang and W. Y. Li, *J. Mater. Chem. A*, 2019, **7**, 23747–23755.
- [46] X. Jin, Y. Zhao, Z. H. Shen, J. Pu, X. X. Xu, C. L. Zhong, S. Zhang, J. C. Li and H. G. Zhang, *Energy Storage Mater.*, 2020, **31**, 221–229.
